# Supplementary material for: Hooked on switch: strain-managed cooperative Jahn–Teller effect in Li0.95Mn2.05O4 spinel
Source: Royal Society of Chemistry journal article supplement (doi:10.1039/c4ra11533c), 2014-01-01
Supplement: c4ra11533c2.pdf [file c4ra11533c2.pdf]

Electronic Supplementary Information

## Hooked on switch: Strain managed cooperative Jahn–Teller effect in $\text{Li}_{0.95}\text{Mn}_{2.05}\text{O}_4$ spinel

Jolanta Darul,<sup>a</sup> Christian Lathe<sup>b</sup> and Paweł Piszora<sup>a,\*</sup>

<sup>a</sup>Department of Materials Chemistry, Faculty of Chemistry, Adam Mickiewicz University, Umultowska 89b, 61-614 Poznań, Poland

<sup>b</sup>Helmholtz Centre Potsdam, GFZ German Research Centre for Geosciences, Telegrafenberg 14473 Potsdam, Germany

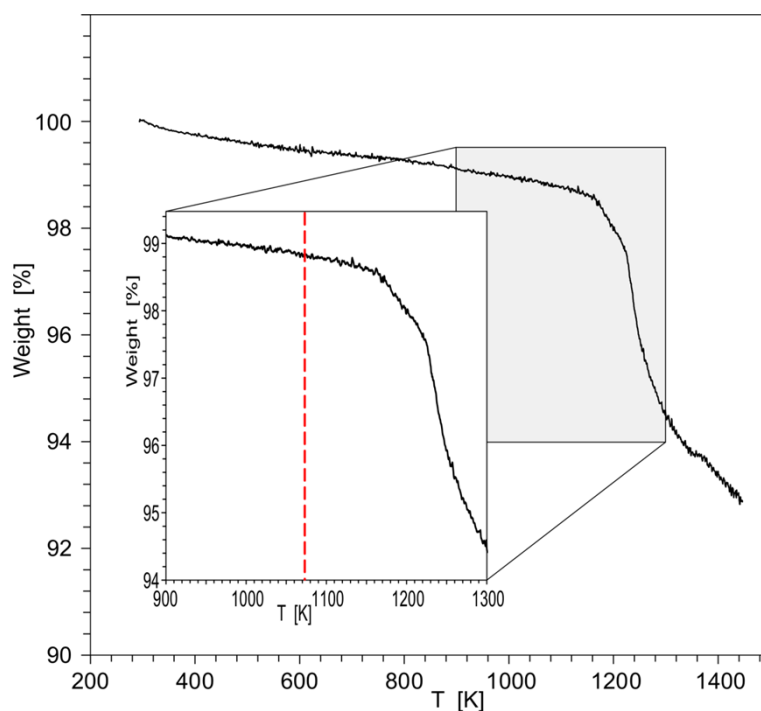

Figure S1. TG curve for  $\text{Li}_{0.95}\text{Mn}_{2.05}\text{O}_4$ . A dashed line indicates the sintering temperature.

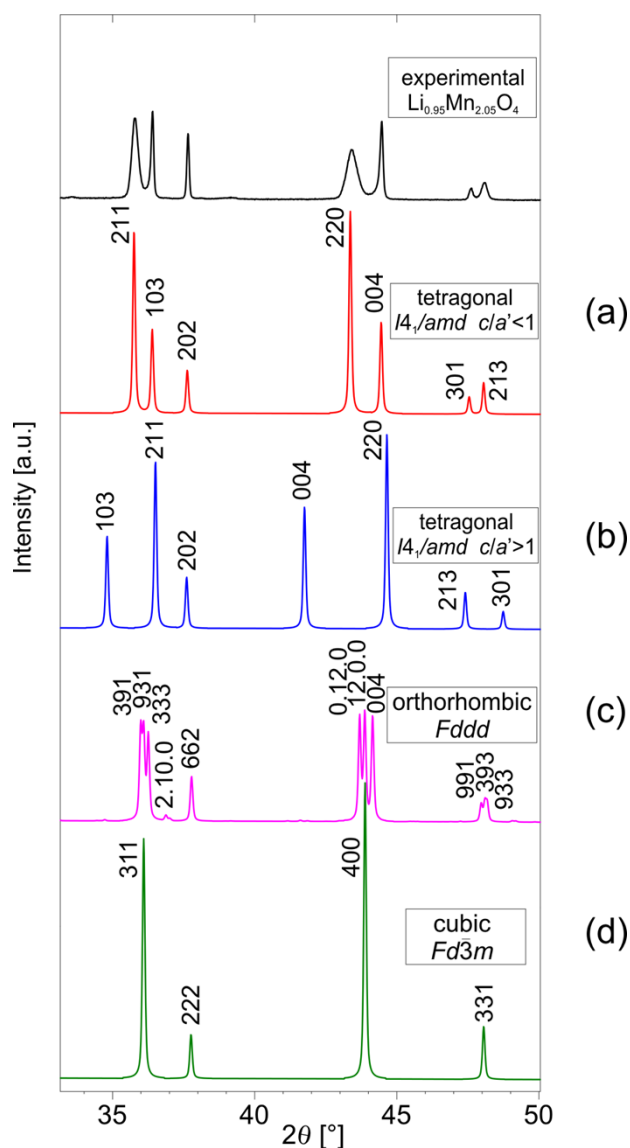

Figure S2. Comparison of the experimental XRD pattern with the patterns calculated for typical structures of lithium-manganese oxides: tetragonal ( $I4_1/amd$ )  $\text{Li}_{0.95}\text{Mn}_{2.05}\text{O}_4$  sample quenched from 1073 K – this study (a); tetragonal ( $I4_1/amd$ )  $\text{LiMn}_2\text{O}_{3.86}$  synthesized at 1193 K and quenched in liquid  $\text{N}_2$  (b)<sup>S1</sup>; orthorhombic ( $Fddd$ )  $\text{LiMn}_2\text{O}_4$  refined at 230 K (c)<sup>S2</sup>; cubic ( $Fd\bar{3}m$ )  $\text{LiMn}_2\text{O}_4$  obtained at 1173 K in  $\text{O}_2$  atmosphere and slowly cooled to room temperature (d)<sup>S1</sup>; Profile function for all calculated patterns is pseudo-Voight without any corrections for microstrain.

Rietveld refinement of laboratory XRD data collected under ambient conditions.

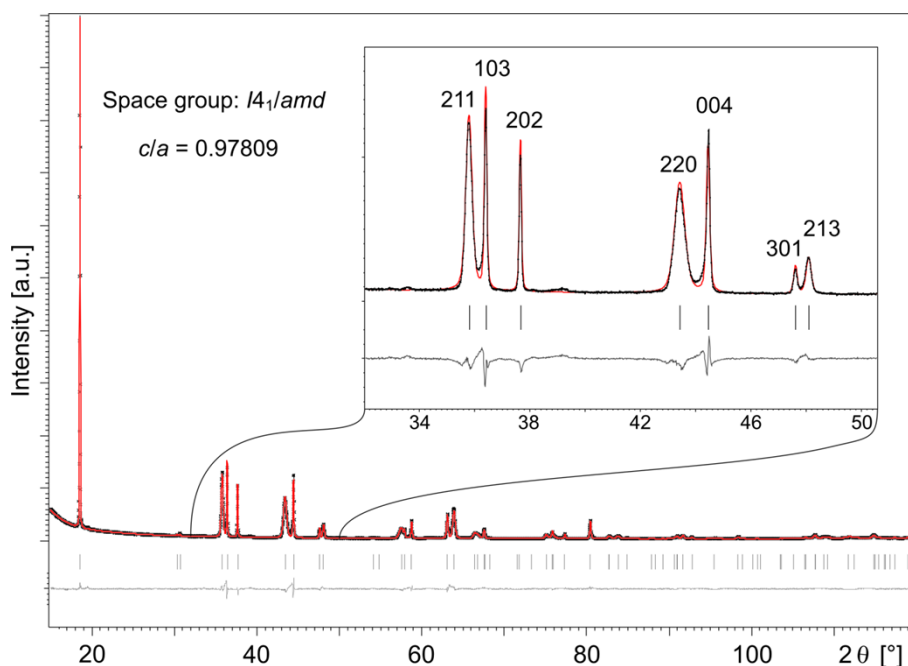

Figure S3. Observed, calculated and difference plot for the tetragonal lithium manganese spinel,  $\text{Li}_{0.95}\text{Mn}_{2.05}\text{O}_4$ , under ambient conditions.

The unit cell parameters determined under ambient conditions are:  $a = 5.88602(19)$  and  $c = 8.1417(3)$ . Atomic coordinates, selected bond lengths and angles are presented in Tables 3 and 4, respectively. Non negligible discrepancy between expected R and observed  $R_{wp}$  parameters at the final stage of refinement is connected with the use of analytical function to model the pattern. The reason is the observed earlier limitation of using a symmetrical pseudo-Voigt profile function to model the profile function produced by the real system.<sup>S3</sup>

Table S1. Atomic coordinates and displacement parameters resulting from Rietveld refinement of the  $\text{Li}_{0.95}\text{Mn}_{2.05}\text{O}_4$  pattern collected under ambient conditions.

|               | <i>x</i> | <i>y</i>  | <i>z</i>  | $U_{\text{iso}} [\text{\AA}^2]$ |
|---------------|----------|-----------|-----------|---------------------------------|
| Li/Mn (Tetra) | 0        | 0.75      | 0.125     | 0.015(2)                        |
| Mn (Octa)     | 0        | 0         | 0.5       | 0.0119(3)                       |
| O             | 0        | 0.9767(3) | 0.7370(2) | 0.0185(6)                       |

Space group:  $I4_1/amd$ ;  $\chi^2 = 0.0336$ ,  $R_p = 0.0502$ ,  $R_{wp} = 0.0799$ ;  $R_{exp} = 0.0336$

Table S2. Selected interatomic distances and angles resulting from Rietveld refinement of the  $\text{Li}_{0.95}\text{Mn}_{2.05}\text{O}_4$  pattern collected under ambient conditions.

| Atoms            | Distances [ $\text{\AA}$ ] |
|------------------|----------------------------|
| Li(Tetra)–O      | 1.9623(18)                 |
| Mn(Octa)–O1 x2   | 1.9345(18)                 |
| Mn(Octa)–O1 x4   | 1.9891(12)                 |
|                  | Angles [deg]               |
| O–Li/Mn(Tetra)–O | 110.14(7)                  |
| O–Li/Mn(Tetra)–O | 109.14(4)                  |
| O–Mn(Octa)–O     | 96.06(6)                   |
| O–Mn(Octa)–O     | 180.0(5)                   |
| O–Mn(Octa)–O     | 83.94(6)                   |
| O–Mn(Octa)–O     | 84.25(5)                   |
| O–Mn(Octa)–O     | 95.75(5)                   |

#### REFERENCES

- (S1) R. Kanno, A. Kondo, M. Yonemura, R. Gover, Y. Kawamoto, M. Tabuchi and G. Rouse, The relationships between phases and structures of lithium manganese spinels. *J. Power Sources*, 1999, **81**, 542-546.
- (S2) J. Rodriguez-Carvajal, G. Rouse, C. Masquelier and M. Hervieu, Electronic crystallization in a lithium battery material: columnar ordering of electrons and holes in the spinel  $\text{LiMn}_2\text{O}_4$ . *Phys. Rev. Lett.*, 1998, **81**, 4660.
- (S3) P. Scardi, M. Leoni and Y. H. Dong, Whole diffraction pattern-fitting of polycrystalline fcc materials based on microstructure. *Eur. Phys. J. B*, 2000, **18**, 23-30.

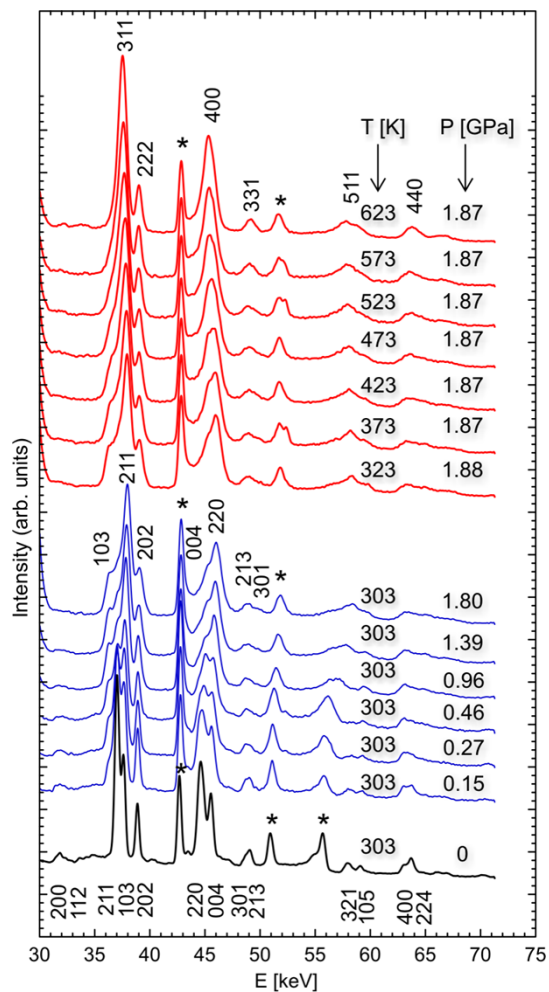

Figure S4. Section of the synchrotron EDXRD patterns obtained *in situ* for  $\text{Li}_{0.95}\text{Mn}_{2.05}\text{O}_4$  sample in HP/HT experiment. Indices at the bottom refer to the tetragonal spinel structure ( $I4_1/amd$ ) with  $c/a' < 1$ , indices in the middle refer to the tetragonal spinel structure ( $I4_1/amd$ ) with  $c/a' > 1$ , indices above the upper pattern – to the cubic spinel ( $Fd\bar{3}m$ ); \* indicates the most pronounced reflections of hBN.

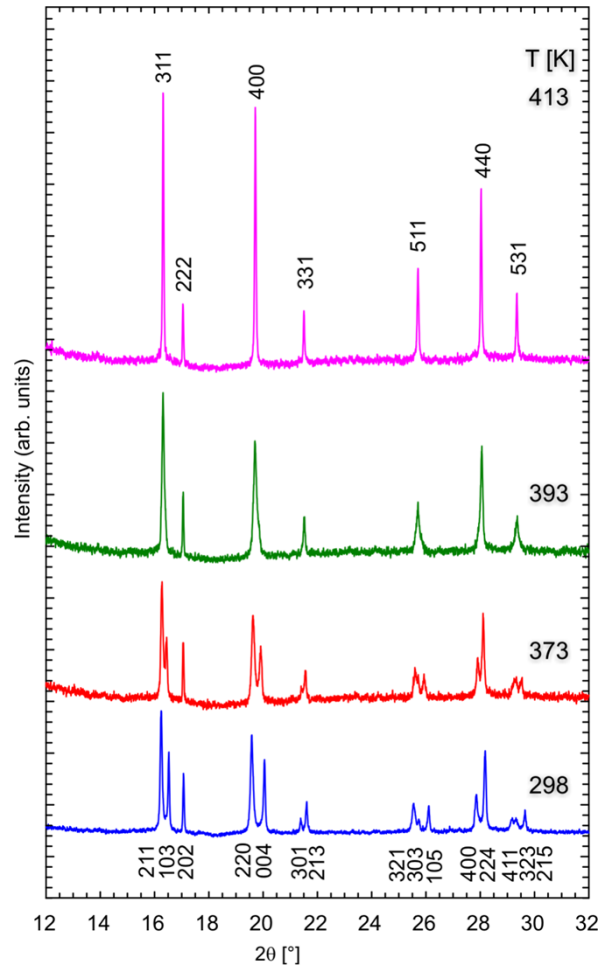

Figure S5. Section of the synchrotron ADXRD patterns obtained *in situ* for  $\text{Li}_{0.95}\text{Mn}_{2.05}\text{O}_4$  sample at various temperatures under ambient pressure. Indices at the bottom refer to the tetragonal spinel structure ( $I4_1/amd$ ) with  $c/a < 1$ , indices above the upper pattern refer to the cubic spinel ( $Fd\bar{3}m$ ).
